# Supplementary material for: Adjuvant Radiotherapy in Surgically Treated HPV-Positive Oropharyngeal Carcinoma with Adverse Pathological Features
Source: MDPI journal article supplement (doi:10.3390/cancers14184515), 2022-09-17

**Table S1: Baseline Characteristics by Adjuvant Radiotherapy**

| <b>Variable</b>                        | <b>Overall<br/>n = 8,375</b> | <b>Did Not Receive<br/>Adjuvant<br/>Radiotherapy<br/>n = 1,108</b> | <b>Received<br/>Adjuvant<br/>Radiotherapy<br/>n = 7,267</b> | <b>p-value</b> |
|----------------------------------------|------------------------------|--------------------------------------------------------------------|-------------------------------------------------------------|----------------|
| <b>Age (mean, SD)</b>                  | 8,375                        | 60.9 (10.4)                                                        | 57.9 (9.1)                                                  | <0.001         |
| <b>Sex</b>                             |                              |                                                                    |                                                             | 0.258          |
| Male                                   | 7,080                        | 924 (83.4)                                                         | 6,156 (84.7)                                                |                |
| Female                                 | 1,295                        | 184 (16.6)                                                         | 1,111 (15.3)                                                |                |
| <b>Race</b>                            |                              |                                                                    |                                                             | 0.068          |
| White                                  | 7,723                        | 1,009 (91.1)                                                       | 6,714 (92.4)                                                |                |
| Black                                  | 285                          | 45 (4.1)                                                           | 240 (3.3)                                                   |                |
| Hispanic                               | 178                          | 24 (2.2)                                                           | 154 (2.1)                                                   |                |
| Asian/Pacific Islander                 | 65                           | 5 (0.5)                                                            | 60 (0.8)                                                    |                |
| <b>Primary site</b>                    |                              |                                                                    |                                                             | <0.001         |
| Tonsil                                 | 6,079                        | 714 (64.4)                                                         | 5,365 (73.8)                                                |                |
| Base of tongue                         | 1,932                        | 318 (28.7)                                                         | 1,614 (22.2)                                                |                |
| Other oropharynx                       | 364                          | 76 (6.9)                                                           | 288 (4.0)                                                   |                |
| <b>Tumor Category</b>                  |                              |                                                                    |                                                             | 0.416          |
| T1                                     | 4,319                        | 584 (52.7)                                                         | 3,735 (51.4)                                                |                |
| T2                                     | 4,056                        | 524 (47.3)                                                         | 3,532 (48.6)                                                |                |
| <b>Nodal Category</b>                  |                              |                                                                    |                                                             | <0.001         |
| N0                                     | 809                          | 215 (19.4)                                                         | 594 (8.2)                                                   |                |
| N1                                     | 6,755                        | 797 (71.9)                                                         | 5,958 (82.0)                                                |                |
| N2                                     | 421                          | 36 (3.3)                                                           | 385 (5.3)                                                   |                |
| N3                                     | 340                          | 48 (4.3)                                                           | 292 (4.0)                                                   |                |
| <b>Tumor Margin Status</b>             |                              |                                                                    |                                                             | <0.001         |
| Negative                               | 3,983                        | 651 (58.8)                                                         | 3,332 (45.9)                                                |                |
| Positive                               | 4,033                        | 430 (38.8)                                                         | 3,603 (49.6)                                                |                |
| Unknown                                | 359                          | 27 (2.4)                                                           | 332 (4.6)                                                   |                |
| <b>Lymphovascular Invasion</b>         |                              |                                                                    |                                                             | <0.001         |
| Negative                               | 3,847                        | 462 (41.7)                                                         | 3,385 (46.6)                                                |                |
| Positive                               | 2,809                        | 489 (44.1)                                                         | 2,320 (31.9)                                                |                |
| Unknown                                | 1,719                        | 157 (14.2)                                                         | 1,562 (21.5)                                                |                |
| <b>Extranodal Extension</b>            |                              |                                                                    |                                                             | <0.001         |
| Negative                               | 2,453                        | 464 (41.9)                                                         | 1,989 (27.4)                                                |                |
| Positive                               | 3,238                        | 386 (34.8)                                                         | 2,852 (39.3)                                                |                |
| Unknown                                | 2,684                        | 258 (23.3)                                                         | 2,426 (33.4)                                                |                |
| <b>Level 4/5 Lymph Node</b>            |                              |                                                                    |                                                             | 0.024          |
| Negative                               | 6,224                        | 841 (75.9)                                                         | 5,383 (74.1)                                                |                |
| Positive                               | 1,710                        | 197 (17.8)                                                         | 1,513 (20.8)                                                |                |
| Unknown                                | 441                          | 70 (6.3)                                                           | 371 (5.1)                                                   |                |
| <b>Charlson-Deyo Comorbidity Score</b> |                              |                                                                    |                                                             | <0.001         |
| 0                                      | 6,836                        | 852 (76.9)                                                         | 5,984 (82.3)                                                |                |
| 1                                      | 1,147                        | 174 (15.7)                                                         | 973 (13.4)                                                  |                |
| 2                                      | 251                          | 47 (4.2)                                                           | 204 (2.8)                                                   |                |
| 3                                      | 141                          | 35 (3.2)                                                           | 106 (1.5)                                                   |                |
| <b>Primary Payor</b>                   |                              |                                                                    |                                                             | <0.001         |
| Not Insured                            | 186                          | 33 (3.0)                                                           | 153 (2.1)                                                   |                |
| Private                                | 5,330                        | 581 (52.4)                                                         | 4,749 (65.4)                                                |                |
| Medicaid / Medicare / Gov.             | 2,766                        | 479 (43.2)                                                         | 2,287 (31.5)                                                |                |
| <b>Median Household Income</b>         |                              |                                                                    |                                                             | 0.122          |
| > \$63,000                             | 2,888                        | 366 (37.2)                                                         | 2,522 (40.5)                                                |                |
| \$48,000 - 62,999                      | 1,986                        | 275 (28.0)                                                         | 1,711 (27.5)                                                |                |
| \$38,000 - 47,999                      | 1,493                        | 208 (21.2)                                                         | 1,285 (20.6)                                                |                |
| < \$38,000                             | 849                          | 134 (13.6)                                                         | 715 (11.5)                                                  |                |

Table S2: Cox Proportional Hazards Analysis of Patients with HPV-OPC

|                                 |  | Unadjusted Analysis    |             |             | Adjusted Analyses |             |             |                    |             |             |                    |             |             |                    |             |             |                      |             |             |        |
|---------------------------------|--|------------------------|-------------|-------------|-------------------|-------------|-------------|--------------------|-------------|-------------|--------------------|-------------|-------------|--------------------|-------------|-------------|----------------------|-------------|-------------|--------|
|                                 |  | n=15,036               |             |             | Any AF (n=12,780) |             |             | PSM (n=12,780)     |             |             | ENE (n=12,780)     |             |             | LVI (n=12,780)     |             |             | LN4/5 (n=12,780)     |             |             |        |
|                                 |  | HR                     | 95% CI      | p-value     | aHRA <sub>F</sub> | 95% CI      | p-value     | aHR <sub>PSM</sub> | 95% CI      | p-value     | aHR <sub>ENE</sub> | 95% CI      | p-value     | aHR <sub>LVI</sub> | 95% CI      | p-value     | aHR <sub>LN4/5</sub> | 95% CI      | p-value     |        |
| Age                             |  | 1.057                  | 1.052-1.062 | <0.001      | 1.036             | 1.030-1.043 | <0.001      | 1.037              | 1.031-1.043 | <0.001      | 1.036              | 1.030-1.042 | <0.001      | 1.037              | 1.031-1.043 | <0.001      | 1.037                | 1.031-1.043 | <0.001      |        |
| Sex                             |  | Male                   | 1.000       | --          | --                |             |             |                    |             |             |                    |             |             |                    |             |             |                      |             |             |        |
|                                 |  | Female                 | 0.982       | 0.872-1.105 | 0.760             |             |             |                    |             |             |                    |             |             |                    |             |             |                      |             |             |        |
| Race                            |  | White                  | 1.000       | --          | --                | 1.000       | --          | --                 | 1.000       | --          | --                 | 1.000       | --          | --                 | 1.000       | --          | --                   | 1.000       | --          | --     |
|                                 |  | Black                  | 1.712       | 1.412-2.075 | <0.001            | 1.418       | 1.148-1.751 | 0.001              | 1.416       | 1.149-1.746 | 0.001              | 1.389       | 1.127-1.713 | 0.002              | 1.402       | 1.138-1.729 | 0.002                | 1.425       | 1.156-1.757 | 0.001  |
|                                 |  | Hispanic               | 0.696       | 0.488-0.992 | 0.045             | 0.709       | 0.484-1.038 | 0.077              | 0.683       | 0.466-1.000 | 0.050              | 0.684       | 0.467-1.002 | 0.051              | 0.667       | 0.456-0.977 | 0.038                | 0.689       | 0.470-1.009 | 0.055  |
|                                 |  | Asian/Pacific Islander | 1.169       | 0.753-1.817 | 0.487             | 1.341       | 0.831-2.165 | 0.230              | 1.303       | 0.818-2.077 | 0.265              | 1.297       | 0.814-2.067 | 0.274              | 1.276       | 0.801-2.032 | 0.305                | 1.282       | 0.805-2.042 | 0.296  |
| Primary site                    |  | Tonsil                 | 1.000       | --          | --                | 1.000       | --          | --                 | 1.000       | --          | --                 | 1.000       | --          | --                 | 1.000       | --          | --                   | 1.000       | --          | --     |
|                                 |  | Base of tongue         | 1.014       | 0.913-1.127 | 0.791             | 0.868       | 0.772-0.976 | 0.018              | 0.904       | 0.804-1.016 | 0.090              | 0.902       | 0.802-1.015 | 0.086              | 0.863       | 0.768-0.969 | 0.013                | 0.854       | 0.760-0.959 | 0.008  |
|                                 |  | Other oropharynx       | 1.706       | 1.432-2.032 | <0.001            | 1.336       | 1.107-1.611 | 0.002              | 1.359       | 1.127-1.639 | 0.001              | 1.278       | 1.059-1.542 | 0.010              | 1.323       | 1.098-1.595 | 0.003                | 1.315       | 1.091-1.585 | 0.004  |
| Tumor category                  |  | T1                     | 1.000       | --          | --                | 1.000       | --          | --                 | 1.000       | --          | --                 | 1.000       | --          | --                 | 1.000       | --          | --                   | 1.000       | --          | --     |
|                                 |  | T2                     | 1.400       | 1.282-1.529 | <0.001            | 1.287       | 1.169-1.417 | <0.001             | 1.286       | 1.168-1.416 | <0.001             | 1.313       | 1.193-1.445 | <0.001             | 1.290       | 1.172-1.420 | <0.001               | 1.313       | 1.193-1.445 | <0.001 |
| Nodal category                  |  | N0                     | 1.000       | --          | --                | 1.000       | --          | --                 | 1.000       | --          | --                 | 1.000       | --          | --                 | 1.000       | --          | --                   | 1.000       | --          | --     |
|                                 |  | N1                     | 0.671       | 0.602-0.748 | <0.001            | 0.783       | 0.691-0.888 | <0.001             | 0.882       | 0.780-0.998 | 0.046              | 0.914       | 0.802-1.042 | 0.179              | 0.822       | 0.725-0.931 | 0.002                | 0.796       | 0.701-0.903 | <0.001 |
|                                 |  | N2                     | 1.208       | 0.989-1.475 | 0.064             | 1.468       | 1.170-1.843 | 0.001              | 1.606       | 1.284-2.007 | <0.001             | 1.580       | 1.263-1.978 | <0.001             | 1.561       | 1.248-1.953 | <0.001               | 1.423       | 1.132-1.789 | 0.003  |
|                                 |  | N3                     | 1.327       | 1.059-1.661 | 0.014             | 1.383       | 1.074-1.780 | 0.012              | 1.765       | 1.381-2.257 | <0.001             | 1.677       | 1.299-2.165 | <0.001             | 1.576       | 1.231-2.019 | <0.001               | 1.432       | 1.113-1.843 | 0.005  |
|                                 |  | Unknown                | 1.178       | 0.725-1.912 | 0.509             | 1.036       | 0.582-1.843 | 0.905              | 1.069       | 0.614-1.861 | 0.815              | 0.972       | 0.558-1.693 | 0.921              | 1.169       | 0.671-2.034 | 0.582                | 1.095       | 0.627-1.911 | 0.751  |
| Adverse features                |  | No                     | 1.000       | --          | --                | 1.000       | --          | --                 |             |             |                    |             |             |                    |             |             |                      |             |             |        |
|                                 |  | Yes                    | 1.438       | 1.312-1.576 | <0.001            | 1.559       | 1.404-1.732 | <0.001             |             |             |                    |             |             |                    |             |             |                      |             |             |        |
| PSM                             |  | Negative               | 1.000       | --          | --                |             |             |                    | 1.000       | --          | --                 |             |             |                    |             |             |                      |             |             |        |
|                                 |  | Positive               | 1.490       | 1.354-1.640 | <0.001            |             |             |                    | 1.572       | 1.412-1.750 | <0.001             |             |             |                    |             |             |                      |             |             |        |
|                                 |  | Unknown                | 1.291       | 1.116-1.494 | 0.001             |             |             |                    | 1.270       | 1.081-1.491 | 0.004              |             |             |                    |             |             |                      |             |             |        |
| ENE                             |  | Negative               | 1.000       | --          | --                |             |             |                    |             |             | 1.000              | --          | --          |                    |             |             |                      |             |             |        |
|                                 |  | Positive               | 1.785       | 1.585-2.010 | <0.001            |             |             |                    |             |             | 1.744              | 1.524-1.995 | <0.001      |                    |             |             |                      |             |             |        |
|                                 |  | Unknown                | 1.882       | 1.696-2.089 | <0.001            |             |             |                    |             |             | 1.844              | 1.639-2.074 | <0.001      |                    |             |             |                      |             |             |        |
| LVI                             |  | Negative               | 1.000       | --          | --                |             |             |                    |             |             |                    |             |             | 1.000              | --          | --          |                      |             |             |        |
|                                 |  | Positive               | 1.535       | 1.376-1.711 | <0.001            |             |             |                    |             |             |                    |             |             | 1.450              | 1.285-1.637 | <0.001      |                      |             |             |        |
|                                 |  | Unknown                | 1.109       | 0.997-1.234 | 0.058             |             |             |                    |             |             |                    |             |             | 1.169              | 1.042-1.311 | 0.008       |                      |             |             |        |
| LN4/5                           |  | Negative               | 1.000       | --          | --                |             |             |                    |             |             |                    |             |             |                    |             |             | 1.000                | --          | --          |        |
|                                 |  | Positive               | 1.625       | 1.443-1.830 | <0.001            |             |             |                    |             |             |                    |             |             |                    |             |             | 1.626                | 1.422-1.861 | <0.001      |        |
|                                 |  | Unknown                | 1.170       | 0.972-1.408 | 0.097             |             |             |                    |             |             |                    |             |             |                    |             |             | 1.215                | 0.993-1.488 | 0.059       |        |
| Adjuvant radiation              |  | No                     | 1.000       | --          | --                | 1.000       | --          | --                 | 1.000       | --          | --                 | 1.000       | --          | --                 | 1.000       | --          | --                   | 1.000       | --          | --     |
|                                 |  | Yes                    | 0.624       | 0.565-0.688 | <0.001            | 0.689       | 0.613-0.774 | <0.001             | 0.673       | 0.598-0.757 | <0.001             | 0.641       | 0.569-0.721 | <0.001             | 0.742       | 0.661-0.833 | <0.001               | 0.747       | 0.666-0.838 | <0.001 |
| Charlson-Deyo Comorbidity score |  | 0                      | 1.000       | --          | --                | 1.000       | --          | --                 | 1.000       | --          | --                 | 1.000       | --          | --                 | 1.000       | --          | --                   | 1.000       | --          | --     |
|                                 |  | 1                      | 1.864       | 1.668-2.084 | <0.001            | 1.505       | 0.582-1.843 | <0.001             | 1.505       | 1.334-1.698 | <0.001             | 1.514       | 1.342-1.709 | <0.001             | 1.514       | 1.342-1.709 | <0.001               | 1.511       | 1.339-1.707 | <0.001 |
|                                 |  | 2                      | 3.109       | 2.592-3.729 | <0.001            | 1.953       | 1.598-2.387 | <0.001             | 1.971       | 1.614-2.407 | <0.001             | 1.973       | 1.616-2.409 | <0.001             | 1.963       | 1.607-2.397 | <0.001               | 1.978       | 1.620-2.415 | <0.001 |
|                                 |  | 3                      | 4.866       | 3.930-6.024 | <0.001            | 3.070       | 2.433-3.875 | <0.001             | 3.054       | 2.425-3.848 | <0.001             | 2.980       | 2.364-3.756 | <0.001             | 3.005       | 2.384-3.788 | <0.001               | 3.061       | 2.429-3.858 | <0.001 |
| Primary payor                   |  | Private                | 1.000       | --          | --                | 1.000       | --          | --                 | 1.000       | --          | --                 | 1.000       | --          | --                 | 1.000       | --          | --                   | 1.000       | --          | --     |
|                                 |  | Medicare/Medicaid/Gov. | 2.999       | 2.739-3.284 | <0.001            | 1.721       | 1.531-1.934 | <0.001             | 1.715       | 1.526-1.927 | <0.001             | 1.715       | 1.526-1.926 | <0.001             | 1.713       | 1.525-1.925 | <0.001               | 1.709       | 1.521-1.921 | <0.001 |
|                                 |  | Not insured            | 2.204       | 1.685-2.884 | <0.001            | 2.099       | 1.575-2.797 | <0.001             | 2.053       | 1.540-2.736 | <0.001             | 2.053       | 1.497-2.657 | <0.001             | 2.056       | 1.543-2.739 | <0.001               | 2.107       | 1.582-2.807 | <0.001 |
| Median Household Income         |  | > 63000                | 1.000       | --          | --                | 1.000       | --          | --                 | 1.000       | --          | --                 | 1.000       | --          | --                 | 1.000       | --          | --                   | 1.000       | --          | --     |
|                                 |  | 48,000 - 62,999        | 1.396       | 1.236-1.578 | <0.001            | 1.228       | 1.085-1.389 | 0.001              | 1.233       | 1.090-1.395 | 0.001              | 1.226       | 1.084-1.387 | 0.001              | 1.243       | 1.099-1.406 | 0.001                | 1.245       | 1.101-1.409 | <0.001 |
|                                 |  | 38,000 - 47,999        | 1.600       | 1.409-1.818 | <0.001            | 1.321       | 1.160-1.504 | <0.001             | 1.311       | 1.152-1.492 | <0.001             | 1.291       | 1.133-1.470 | <0.001             | 1.337       | 1.174-1.521 | <0.001               | 1.333       | 1.171-1.517 | <0.001 |
|                                 |  | <38,000                | 2.001       | 1.734-2.309 | <0.001            | 1.550       | 1.336-1.799 | <0.001             | 1.551       | 1.337-1.799 | <0.001             | 1.529       | 1.317-1.774 | <0.001             | 1.571       | 1.354-1.823 | <0.001               | 1.542       | 1.329-1.789 | <0.001 |

Table S3: Cox Proportional Hazards Analysis in Patients with AF-positive HPV-OPC

|                                 |                        | Unadjusted Analysis |             |         | Adjusted Analyses |             |         |                    |             |         |                    |             |         |                    |             |         |                      |             |         |
|---------------------------------|------------------------|---------------------|-------------|---------|-------------------|-------------|---------|--------------------|-------------|---------|--------------------|-------------|---------|--------------------|-------------|---------|----------------------|-------------|---------|
|                                 |                        | n=8,375             |             |         | Any AF n=7,103    |             |         | PSM n=7,103        |             |         | ENE n=7,103        |             |         | LVI n=7,103        |             |         | LN4/5 n=7,103        |             |         |
|                                 |                        | HR                  | 95% CI      | p-value | aHR <sub>AF</sub> | 95% CI      | p-value | aHR <sub>PSM</sub> | 95% CI      | p-value | aHR <sub>ENE</sub> | 95% CI      | p-value | aHR <sub>LVI</sub> | 95% CI      | p-value | aHR <sub>LN4/5</sub> | 95% CI      | p-value |
| Age                             |                        | 1.050               | 1.044-1.056 | <0.001  | 1.030             | 1.023-1.038 | <0.001  | 1.030              | 1.023-1.038 | <0.001  | 1.030              | 1.022-1.037 | <0.001  | 1.030              | 1.023-1.038 | <0.001  | 1.031                | 1.023-1.038 | <0.001  |
| Sex                             | Male                   | 1.000               | --          | --      |                   |             |         |                    |             |         |                    |             |         |                    |             |         |                      |             |         |
|                                 | Female                 | 1.028               | 0.885-1.195 | 0.714   |                   |             |         |                    |             |         |                    |             |         |                    |             |         |                      |             |         |
| Race                            | White                  | 1.000               | --          | --      | 1.000             | --          | --      | 1.000              | --          | --      | 1.000              | --          | --      | 1.000              | --          | --      | 1.000                | --          | --      |
|                                 | Black                  | 1.578               | 1.222-2.037 | <0.001  | 1.356             | 1.027-1.792 | 0.032   | 1.354              | 1.025-1.789 | 0.033   | 1.376              | 1.042-1.818 | 0.025   | 1.344              | 1.017-1.776 | 0.037   | 1.367                | 1.035-1.806 | 0.028   |
|                                 | Hispanic               | 0.734               | 0.461-1.169 | 0.192   | 0.776             | 0.480-1.255 | 0.302   | 0.778              | 0.481-1.259 | 0.307   | 0.790              | 0.488-1.278 | 0.336   | 0.763              | 0.472-1.234 | 0.270   | 0.796                | 0.492-1.288 | 0.353   |
|                                 | Asian/Pacific Islander | 1.115               | 0.616-2.018 | 0.720   | 1.417             | 0.759-2.647 | 0.274   | 1.410              | 0.755-2.634 | 0.281   | 1.410              | 0.755-2.634 | 0.282   | 1.406              | 0.753-2.626 | 0.285   | 1.416                | 0.758-2.644 | 0.275   |
| Primary Site                    | Tonsil                 | 1.000               | --          | --      | 1.000             | --          | --      | 1.000              | --          | --      | 1.000              | --          | --      | 1.000              | --          | --      | 1.000                | --          | --      |
|                                 | Base of tongue         | 0.913               | 0.796-1.046 | 0.189   | 0.799             | 0.687-0.929 | 0.004   | 0.832              | 0.715-0.969 | 0.018   | 0.839              | 0.720-0.978 | 0.025   | 0.797              | 0.686-0.927 | 0.003   | 0.790                | 0.679-0.918 | 0.002   |
|                                 | Other oropharynx       | 1.552               | 1.227-1.965 | <0.001  | 1.252             | 0.976-1.607 | 0.077   | 1.275              | 0.993-1.637 | 0.057   | 1.260              | 0.981-1.618 | 0.070   | 1.238              | 0.964-1.589 | 0.094   | 1.226                | 0.956-1.574 | 0.109   |
| T Stage                         | T1                     | 1.000               | --          | --      | 1.000             | --          | --      | 1.000              | --          | --      | 1.000              | --          | --      | 1.000              | --          | --      | 1.000                | --          | --      |
|                                 | T2                     | 1.448               | 1.296-1.619 | <0.001  | 1.349             | 1.195-1.523 | <0.001  | 1.339              | 1.186-1.512 | <0.001  | 1.334              | 1.182-1.505 | <0.001  | 1.332              | 1.180-1.505 | <0.001  | 1.350                | 1.196-1.524 | <0.001  |
| N Stage                         | N0                     | 1.000               | --          | --      | 1.000             | --          | --      | 1.000              | --          | --      | 1.000              | --          | --      | 1.000              | --          | --      | 1.000                | --          | --      |
|                                 | N1                     | 0.646               | 0.548-0.762 | <0.001  | 0.800             | 0.672-0.953 | 0.013   | 0.868              | 0.725-1.039 | 0.122   | 0.883              | 0.731-1.067 | 0.198   | 0.795              | 0.667-0.948 | 0.010   | 0.731                | 0.611-0.875 | 0.001   |
|                                 | N2                     | 1.233               | 0.965-1.575 | 0.094   | 1.665             | 1.277-2.172 | <0.001  | 1.719              | 1.315-2.248 | <0.001  | 1.709              | 1.305-2.237 | <0.001  | 1.641              | 1.258-2.141 | <0.001  | 1.423                | 1.081-1.872 | 0.012   |
|                                 | N3                     | 1.082               | 0.820-1.428 | 0.579   | 1.272             | 0.943-1.714 | 0.115   | 1.410              | 1.039-1.912 | 0.027   | 1.373              | 1.004-1.877 | 0.047   | 1.262              | 0.936-1.702 | 0.128   | 1.097                | 0.808-1.489 | 0.553   |
|                                 | Unknown                | 0.773               | 0.363-1.647 | 0.505   | 0.594             | 0.220-1.605 | 0.304   | 0.569              | 0.211-1.538 | 0.267   | 0.528              | 0.195-1.427 | 0.208   | 0.617              | 0.228-1.669 | 0.342   | 0.563                | 0.208-1.526 | 0.259   |
| PSM                             | Negative               | 1.000               | --          | --      |                   |             |         | 1.000              | --          | --      |                    |             |         |                    |             |         |                      |             |         |
|                                 | Positive               | 1.284               | 1.145-1.439 | <0.001  |                   |             |         | 1.323              | 1.162-1.507 | <0.001  |                    |             |         |                    |             |         |                      |             |         |
|                                 | Unknown                | 1.361               | 1.054-1.759 | 0.018   |                   |             |         | 1.486              | 1.127-1.960 | 0.005   |                    |             |         |                    |             |         |                      |             |         |
| ENE                             | Negative               | 1.000               | --          | --      |                   |             |         |                    |             |         | 1.000              | --          | --      |                    |             |         |                      |             |         |
|                                 | Positive               | 1.477               | 1.273-1.713 | <0.001  |                   |             |         |                    |             |         | 1.409              | 1.198-1.656 | <0.001  |                    |             |         |                      |             |         |
|                                 | Unknown                | 1.723               | 1.484-2.001 | <0.001  |                   |             |         |                    |             |         | 1.680              | 1.423-1.983 | <0.001  |                    |             |         |                      |             |         |
| LVI                             | Negative               | 1.000               | --          | --      |                   |             |         |                    |             |         |                    |             |         | 1.000              | --          | --      |                      |             |         |
|                                 | Positive               | 1.328               | 1.173-1.503 | <0.001  |                   |             |         |                    |             |         |                    |             |         | 1.176              | 1.027-1.348 | 0.019   |                      |             |         |
|                                 | Unknown                | 1.101               | 0.950-1.277 | 0.202   |                   |             |         |                    |             |         |                    |             |         | 1.157              | 0.988-1.355 | 0.070   |                      |             |         |
| LN4/5                           | Negative               | 1.000               | --          | --      |                   |             |         |                    |             |         |                    |             |         |                    |             |         | 1.000                | --          | --      |
|                                 | Positive               | 1.438               | 1.266-1.632 | <0.001  |                   |             |         |                    |             |         |                    |             |         |                    |             |         | 1.420                | 1.231-1.639 | <0.001  |
|                                 | Unknown                | 1.296               | 1.029-1.632 | 0.027   |                   |             |         |                    |             |         |                    |             |         |                    |             |         | 1.235                | 0.953-1.599 | 0.111   |
| Adjuvant Radiation              | No                     | 1.000               | --          | --      | 1.000             | --          | --      | 1.000              | --          | --      | 1.000              | --          | --      | 1.000              | --          | --      | 1.000                | --          | --      |
|                                 | Yes                    | 0.484               | 0.422-0.554 | <0.001  | 0.595             | 0.513-0.691 | <0.001  | 0.564              | 0.485-0.657 | <0.001  | 0.556              | 0.478-0.647 | <0.001  | 0.602              | 0.518-0.700 | <0.001  | 0.598                | 0.515-0.694 | <0.001  |
| Charlson-Deyo Comorbidity Score | 0                      | 1.000               | --          | --      | 1.000             | --          | --      | 1.000              | --          | --      | 1.000              | --          | --      | 1.000              | --          | --      | 1.000                | --          | --      |
|                                 | 1                      | 1.774               | 1.541-2.042 | <0.001  | 1.422             | 1.220-1.657 | <0.001  | 1.425              | 1.223-1.661 | <0.001  | 1.425              | 1.223-1.660 | <0.001  | 1.422              | 1.221-1.657 | <0.001  | 1.424                | 1.222-1.660 | <0.001  |
|                                 | 2                      | 2.793               | 2.212-3.525 | <0.001  | 1.775             | 1.368-2.302 | <0.001  | 1.767              | 1.362-2.294 | <0.001  | 1.786              | 1.377-2.317 | <0.001  | 1.762              | 1.358-2.286 | <0.001  | 1.781                | 1.373-2.311 | <0.001  |
|                                 | 3                      | 4.301               | 3.296-5.612 | <0.001  | 2.838             | 2.123-3.794 | <0.001  | 2.847              | 2.130-3.807 | <0.001  | 2.868              | 2.145-3.837 | <0.001  | 2.803              | 2.096-3.748 | <0.001  | 2.839                | 2.122-3.796 | <0.001  |
| Primary Payor                   | Private                | 1.000               | --          | --      | 1.000             | --          | --      | 1.000              | --          | --      | 1.000              | --          | --      | 1.000              | --          | --      | 1.000                | --          | --      |
|                                 | Medicare/Medicaid/Gov. | 2.821               | 2.518-3.160 | <0.001  | 1.803             | 1.560-2.084 | <0.001  | 1.802              | 1.559-2.082 | <0.001  | 1.803              | 1.560-2.083 | <0.001  | 1.800              | 1.557-2.081 | <0.001  | 1.787                | 1.546-2.067 | <0.001  |
|                                 | Not insured            | 2.419               | 1.748-3.348 | <0.001  | 2.283             | 1.619-3.218 | <0.001  | 2.240              | 1.588-3.160 | <0.001  | 2.217              | 1.572-3.128 | <0.001  | 2.258              | 1.601-3.184 | <0.001  | 2.312                | 1.640-3.260 | <0.001  |
| Median Household Income         | > 63000                | 1.000               | --          | --      | 1.000             | --          | --      | 1.000              | --          | --      | 1.000              | --          | --      | 1.000              | --          | --      | 1.000                | --          | --      |
|                                 | 48,000 - 62,999        | 1.509               | 1.297-1.755 | <0.001  | 1.343             | 1.153-1.565 | <0.001  | 1.335              | 1.146-1.556 | <0.001  | 1.328              | 1.140-1.547 | <0.001  | 1.348              | 1.157-1.570 | <0.001  | 1.348                | 1.157-1.570 | <0.001  |
|                                 | 38,000 - 47,999        | 1.566               | 1.332-1.841 | <0.001  | 1.305             | 1.107-1.539 | 0.002   | 1.290              | 1.094-1.521 | 0.002   | 1.286              | 1.091-1.517 | 0.003   | 1.308              | 1.109-1.542 | 0.001   | 1.303                | 1.106-1.537 | 0.002   |
|                                 | <38,000                | 1.913               | 1.592-2.297 | <0.001  | 1.479             | 1.224-1.788 | <0.001  | 1.471              | 1.217-1.778 | <0.001  | 1.452              | 1.202-1.756 | <0.001  | 1.488              | 1.232-1.799 | <0.001  | 1.453                | 1.202-1.756 | <0.001  |

**Table S4 - Baseline Characteristics of the Propensity Score Matched Cohort**

|                                |                        | <b>Overall<br/>HPV-OPC<br/>n= 1,678</b> | <b>No Adjuvant<br/>Radiotherapy<br/>n=460</b> | <b>Adjuvant<br/>Radiotherapy<br/>n=1,218</b> | <b>p-value</b> |
|--------------------------------|------------------------|-----------------------------------------|-----------------------------------------------|----------------------------------------------|----------------|
| <b>Age mean (SD)</b>           |                        | 61.6 (9.5)                              | 62.5 (10.0)                                   | 61.2 (9.3)                                   | 0.011          |
| <b>Race</b>                    | White                  | 1,540 (91.8)                            | 420 (91.3)                                    | 1,120 (92.0)                                 | 0.962          |
|                                | Black                  | 88 (5.2)                                | 25 (5.4)                                      | 63 (5.2)                                     |                |
|                                | Hispanic               | 41 (2.4)                                | 12 (2.6)                                      | 29 (2.4)                                     |                |
|                                | Asian/Pacific Islander | 9 (0.5)                                 | 3 (0.7)                                       | 6 (0.5)                                      |                |
| <b>Primary site</b>            | Tonsil                 | 1031 (61.4)                             | 268 (58.3)                                    | 763 (62.6)                                   | 0.254          |
|                                | Base of tongue         | 557 (33.2)                              | 166 (36.1)                                    | 391 (32.1)                                   |                |
|                                | Other oropharynx       | 90 (5.4)                                | 26 (5.7)                                      | 64 (5.3)                                     |                |
| <b>T Stage</b>                 | T1                     | 879 (52.4)                              | 235 (51.1)                                    | 644 (52.9)                                   | 0.513          |
|                                | T2                     | 799 (47.6)                              | 225 (48.9)                                    | 574 (47.1)                                   |                |
| <b>N Stage</b>                 | N0                     | 178 (10.6)                              | 87 (18.9)                                     | 91 (7.5)                                     | <0.001         |
|                                | N1                     | 1,401 (83.5)                            | 349 (75.9)                                    | 1,052 (86.4)                                 |                |
|                                | N2                     | 40 (2.4)                                | 8 (1.7)                                       | 32 (2.6)                                     |                |
|                                | N3                     | 59 (3.5)                                | 16 (3.5)                                      | 43 (3.5)                                     |                |
| <b>Primary Payor</b>           | Private insurance      | 813 (48.5)                              | 210 (45.7)                                    | 603 (49.5)                                   | 0.362          |
|                                | Medicare/Medicaid/Gov. | 812 (48.4)                              | 234 (50.9)                                    | 578 (47.5)                                   |                |
|                                | Not insured            | 53 (3.2)                                | 16 (3.5)                                      | 37 (3.0)                                     |                |
| <b>Median Household Income</b> | > \$63,000             | 564 (33.6)                              | 143 (31.1)                                    | 421 (34.6)                                   | 0.559          |
|                                | \$48,000 - \$62,999    | 477 (28.4)                              | 138 (30.0)                                    | 339 (27.8)                                   |                |
|                                | \$38,000 - \$47,999    | 378 (22.5)                              | 104 (22.6)                                    | 274 (22.5)                                   |                |
|                                | < \$38,000             | 259 (15.4)                              | 75 (16.3)                                     | 184 (15.1)                                   |                |
| <b>Charlson Deyo Score</b>     | 0                      | 1,286 (76.6)                            | 346 (75.2)                                    | 940 (77.2)                                   | 0.835          |
|                                | 1                      | 291 (17.3)                              | 86 (18.7)                                     | 205 (16.8)                                   |                |
|                                | 2                      | 48 (2.9)                                | 13 (2.8)                                      | 35 (2.9)                                     |                |
|                                | 3                      | 53 (3.2)                                | 15 (3.3)                                      | 38 (3.1)                                     |                |
| <b>Tumor Margin Status</b>     | Negative               | 1,255 (74.8)                            | 349 (75.9)                                    | 906 (74.4)                                   | 0.532          |
|                                | Positive               | 423 (25.2)                              | 111 (24.1)                                    | 312 (25.6)                                   |                |
| <b>Lymphovascular Invasion</b> | Negative               | 798 (47.6)                              | 212 (46.1)                                    | 586 (48.1)                                   | 0.459          |
|                                | Positive               | 880 (52.4)                              | 248 (53.9)                                    | 632 (51.9)                                   |                |
| <b>Extranodal Extension</b>    | Negative               | 993 (59.2)                              | 287 (62.4)                                    | 706 (58.0)                                   | 0.100          |
|                                | Positive               | 685 (40.8)                              | 173 (37.6)                                    | 512 (42.0)                                   |                |
| <b>Level 4/5 Lymph Node</b>    | Negative               | 1,300 (77.5)                            | 365 (79.4)                                    | 935 (76.8)                                   | 0.259          |
|                                | Positive               | 378 (22.5)                              | 95 (20.7)                                     | 283 (23.2)                                   |                |

**Figure S1.** Patient Inclusion and Analytic Approach

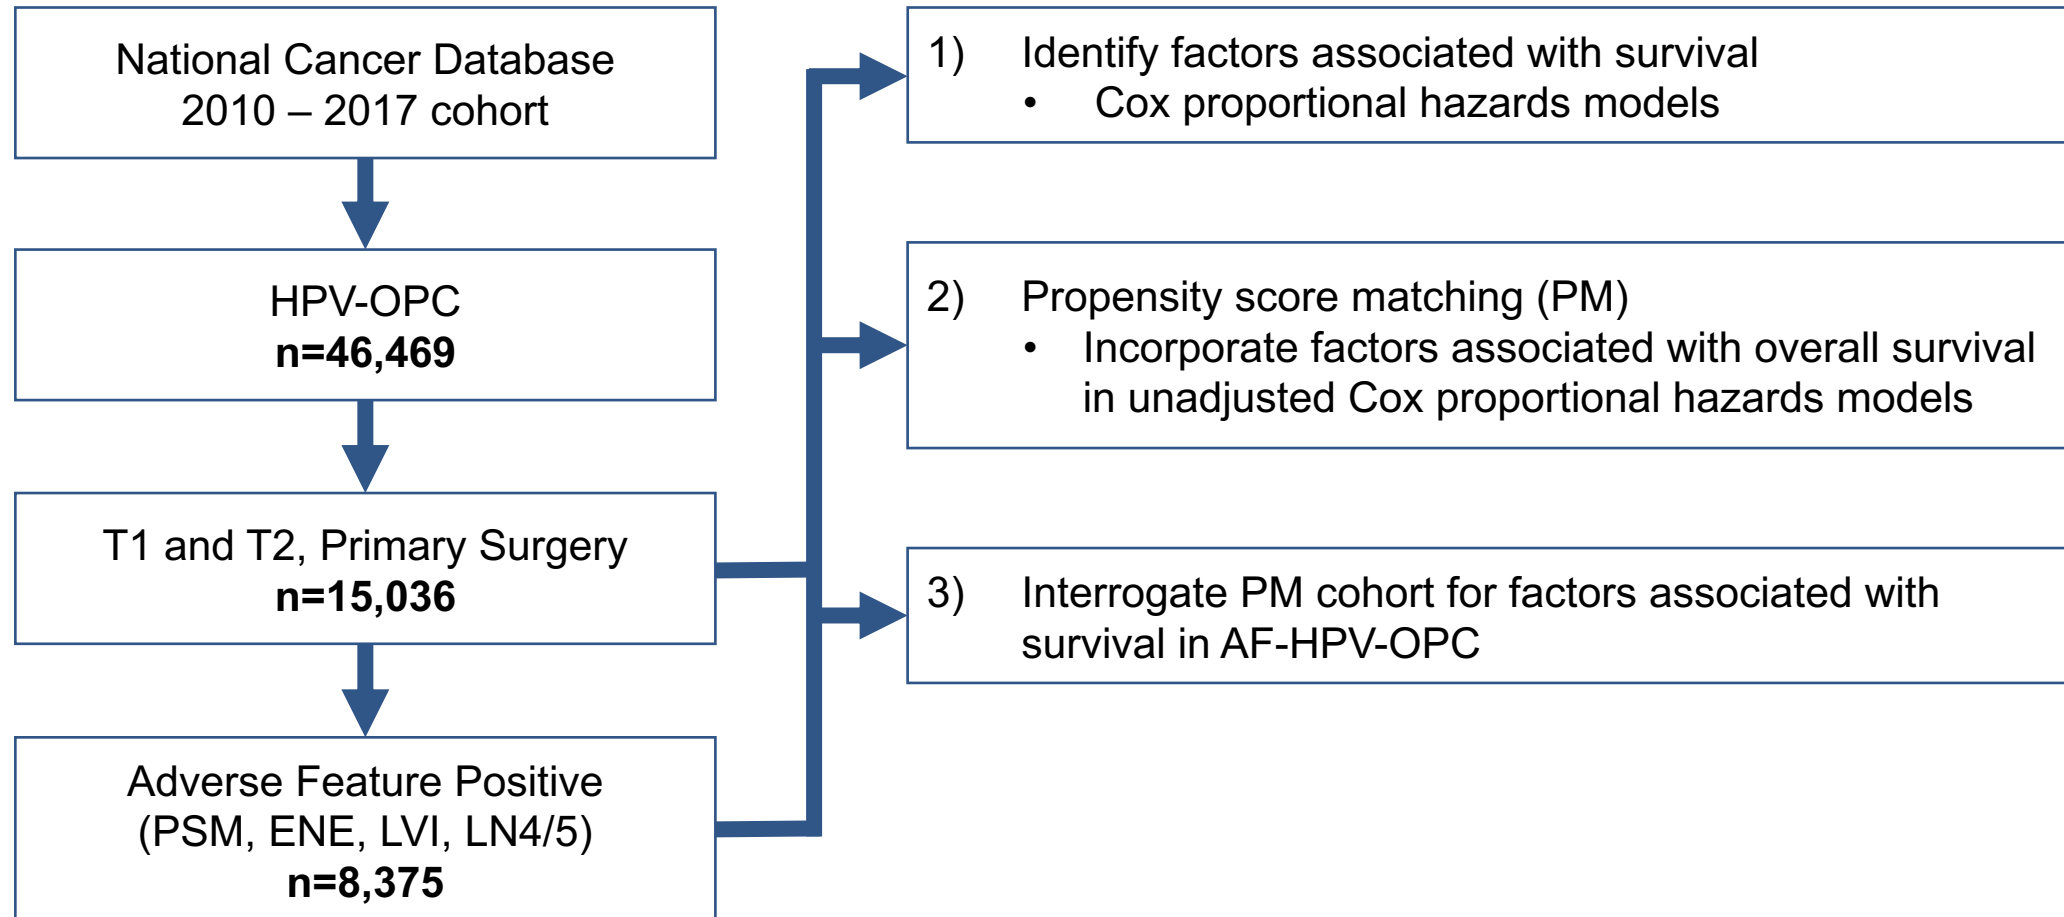

Figure S2. Propensity Score Matching Plot

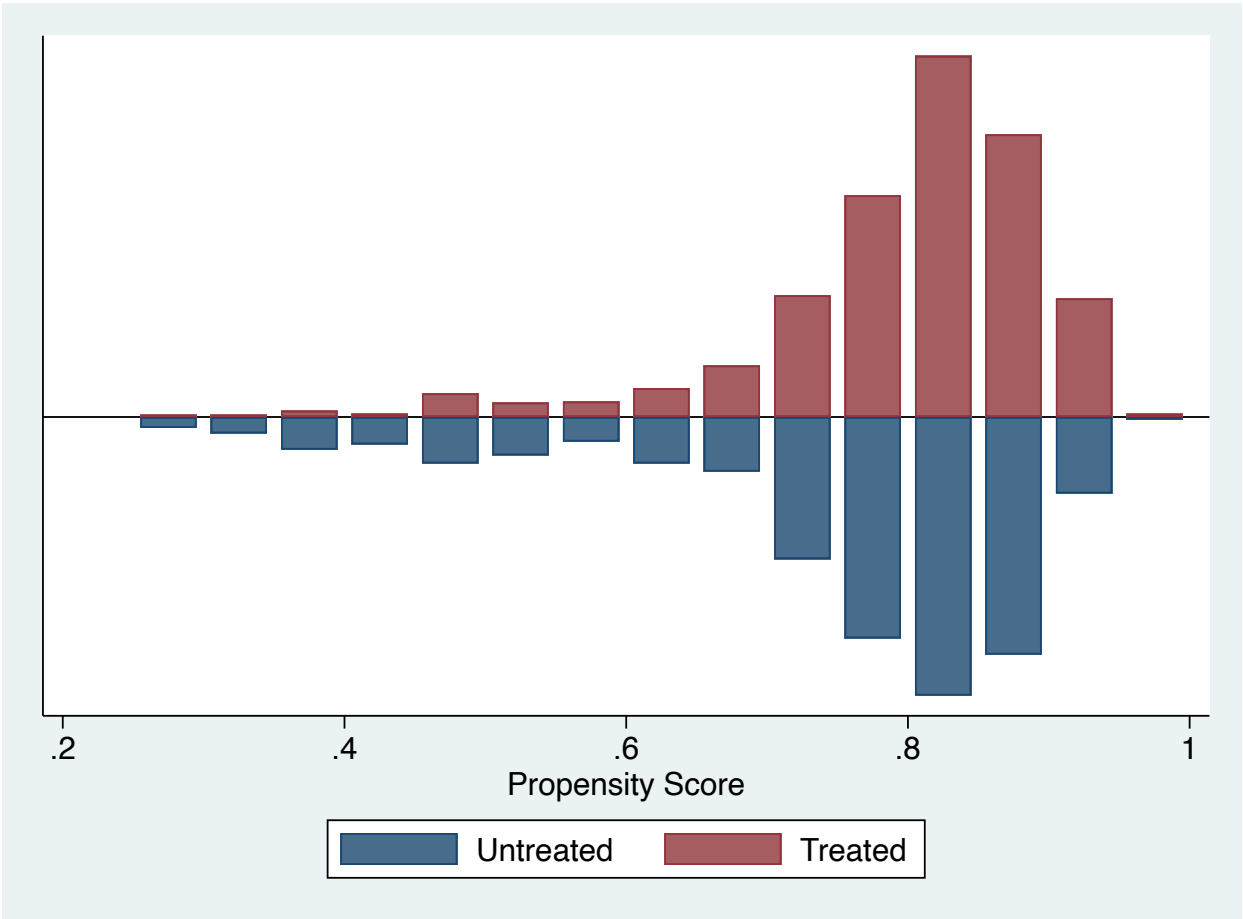

Supplement: s1 [file s1]
